# Supplementary material
Source: Royal Society of Chemistry journal article supplement (doi:10.1039/d6ay00179c)
Supplement: d6ay00179c1.pdf [file d6ay00179c1.pdf]

***Supporting Information for***  
**An Al<sup>3+</sup> Ions-Responsive Blue Emitting Ionic Liquid-Based Nano-Optode and Its**  
**Implications for the Detection of 2, 4, 6-Trinitrophenol**

Shubham Lama and Sudhir Kumar Das\*

Department of Chemistry, University of North Bengal, Raja Rammohunpur, Darjeeling,

West Bengal-734013, India

\*Corresponding author (Dr. S. K. Das, E-mail: [sudhirkumardas@nbu.ac.in](mailto:sudhirkumardas@nbu.ac.in))

## Table of Contents

| Sl. No.          | Descriptions                                                                                                                                       | Page No.  |
|------------------|----------------------------------------------------------------------------------------------------------------------------------------------------|-----------|
| <b>S1.1</b>      | General methods and instrumentation                                                                                                                | <b>1</b>  |
| <b>Fig. S1.</b>  | <sup>1</sup> H NMR spectrum (DMSO- <i>d</i> <sub>6</sub> , 400 MHz) of [TTP][FHS].                                                                 | <b>2</b>  |
| <b>Fig. S2.</b>  | <sup>13</sup> C NMR spectrum (DMSO- <i>d</i> <sub>6</sub> , 100 MHz) of [TTP][FHS].                                                                | <b>3</b>  |
| <b>Fig. S3.</b>  | <sup>31</sup> P NMR spectrum (DMSO- <i>d</i> <sub>6</sub> , 400 MHz) of [TTP][FHS].                                                                | <b>3</b>  |
| <b>Fig. S4.</b>  | <sup>1</sup> H NMR spectrum (DMSO- <i>d</i> <sub>6</sub> , 400 MHz) of <b>HNMIL</b> .                                                              | <b>4</b>  |
| <b>Fig. S5.</b>  | <sup>31</sup> P NMR spectrum (DMSO- <i>d</i> <sub>6</sub> , 400 MHz) of <b>HNMIL</b> .                                                             | <b>4</b>  |
| <b>Fig. S6.</b>  | LC-MS spectra of <b>HNMIL</b> (a) positive ion mode and (b) negative ion mode.                                                                     | <b>5</b>  |
| <b>Fig. S7.</b>  | The relative frequency vs. zeta potential distribution curve for the determination of zeta potential of <b>nHNMIL</b> .                            | <b>6</b>  |
| <b>Fig. S8.</b>  | Fluorescence spectra of <b>HNMIL</b> in water-DMSO mixed solvents demonstrating red shift.                                                         | <b>7</b>  |
| <b>Fig. S9.</b>  | FT-IR spectra of <b>nHNMIL</b> before and after the interaction with Al <sup>3+</sup> ions.                                                        | <b>7</b>  |
| <b>Fig. S10.</b> | Job's plot demonstrating the 1:1 stoichiometric ratio, interaction of Al <sup>3+</sup> ion with <b>nHNMIL</b> .                                    | <b>7</b>  |
| <b>Fig. S11.</b> | Temperature-dependent fluorescence study of <b>nHNMIL</b> and <b>nHNMIL-Al<sup>3+</sup></b> complex.                                               | <b>8</b>  |
| <b>Table S1.</b> | Calculated ΔG values at various temperatures.                                                                                                      | <b>8</b>  |
| <b>Fig. S12.</b> | pH study of <b>nHNMIL</b> and <b>nHNMIL-Al<sup>3+</sup></b> complex.                                                                               | <b>9</b>  |
| <b>Fig. S13.</b> | Calibration curve for determining Al <sup>3+</sup> contamination in different water samples.                                                       | <b>9</b>  |
| <b>Fig. S14.</b> | The calibration curve of G/B vs. [Al <sup>3+</sup> ] using a smartphone-based method under 365-nm UV irradiation, shot by Vivo Y31-S smartphone.   | <b>10</b> |
| <b>Table S2.</b> | Quantitative comparison between smartphone-based measurements and laboratory fluorimeter data.                                                     | <b>10</b> |
| <b>Table S3.</b> | Determination of Al <sup>3+</sup> in water samples.                                                                                                | <b>10</b> |
| <b>Fig. S15.</b> | Estimation of LOD in a real matrix (River water).                                                                                                  | <b>11</b> |
| <b>Fig. S16.</b> | Plot demonstrating the interaction of PA with our formulated <b>nHNMIL-Al<sup>3+</sup></b> complex (a) statically and (b) dynamically.             | <b>12</b> |
| <b>Fig. S17.</b> | Detection limit of PA with our formulated <b>nHNMIL-Al<sup>3+</sup></b> complex.                                                                   | <b>12</b> |
| <b>Table S4.</b> | Comparison table of chemosensors introduced over the last few decades for detecting Al <sup>3+</sup> ions, along with our prepared <b>nHNMIL</b> . | <b>12</b> |
| <b>Table S5.</b> | Comparison of the detection limits for sensing PA across various sensors.                                                                          | <b>14</b> |

## Experimental section

### General methods and instrumentation

Chemical reagents were procured from Sigma-Aldrich, India, and applied without any further purification. Anhydrous solvents and HPLC-grade solvents for spectroscopy were obtained from Merck, India. We have purchased all of the cationic and anionic salts from Sigma-Aldrich in India, including trihexyltetradecylphosphonium chloride [TTP][Cl] and Nicotinic hydrazide. Also, Deuterated chloroform (DMSO- $d_6$ ) was purchased from Sigma-Aldrich, India, and used for NMR spectroscopic analysis. Fourier transform infrared (FT-IR) spectra were recorded using a Bruker Optik GMBH (Germany) FT-IR spectrometer under ambient conditions. Mass spectrometric analysis was performed on a Quattro Micro API (MICROMASS, UK) coupled with an LC-WATERS 2695 system equipped with a PDA2998 detector, ESI\_Negative with capillary voltage 3 kV, Cone -30 V and extractor-3 V employing source and dissolving temperature -90°C and -250°C respectively using dissolving gas-450 Litre/hour with flow rate-10  $\mu$ L/min. We used a HITACHI U-2910 spectrophotometer for monitoring UV-visible absorption spectra, while fluorescence measurements were performed on a HITACHI F-7100 fluorimeter, employing a 5 nm slit width for both excitation and emission. During steady-state emission studies, the excitation wavelength was set to 330 nm, and emission was monitored over 330–640 nm. The size and shape of the **nHNMIL** are estimated by field emission scanning electron microscopy (SEM) (ZEISS) employing an operating voltage of 50 kV by drop casting the required amounts of **nHNMIL** (20  $\mu$ g/mL) on the carbon-coated copper grids. The average particle size is determined by considering the size of more than 100 particles. The hydrodynamic radius of **nHNMIL** is measured employing the High-resolution Photon Correlation Spectroscopy (PCS) technique (Anton Paar Litesizer 500). The zeta potential ( $\zeta$ ) of nanoparticles is also obtained by this instrument using a capillary  $\zeta$ -cell.

Before the analysis, the HNMIL stock solution was prepared immediately ( $1 \times 10^{-3}$  M in DMSO). The solution of numerous inorganic metal salts like  $\text{AlCl}_3$ ,  $\text{BaCl}_2$ ,  $\text{CaCl}_2$ ,  $\text{CdCl}_2$ ,  $\text{CoCl}_2$ ,  $\text{CuCl}_2$ ,  $\text{ZnCl}_2$ ,  $\text{FeCl}_3$ ,  $\text{HgCl}_2$ ,  $\text{MgCl}_2$ ,  $\text{MnCl}_2$ ,  $\text{NiCl}_2$ ,  $\text{PbCl}_2$ , and  $\text{FeCl}_2$  including all the inorganic and organic anion salt like  $\text{AlPO}_4$ ,  $\text{K}_2\text{CO}_3$ ,  $\text{KBr}$ ,  $\text{KCl}$ ,  $\text{NaF}$ ,  $\text{NaBPh}_4$ ,  $\text{Na}_2\text{HPO}_4$ ,  $\text{NaH}_2\text{PO}_4$ ,  $\text{Na}_3\text{PO}_4$ ,  $\text{KPF}_6$ ,  $\text{S}^{2-}$  and  $\text{Na}_2\text{SO}_4$  were prepared instantly in ( $1 \times 10^{-4}$  M) concentration in water.

For the fabrication of paper-based test kit, Whatman-41 filter paper is cut into strips, which are fully immersed in **nHNMIL** aqueous solution ( $85 \mu\text{M}$ ) for a while. Finally, the test strips are removed and dried in a hot air oven at  $60^\circ\text{C}$ . Some drops of each metal ion solution ( $10^{-3}$  M) are added to these filter papers.

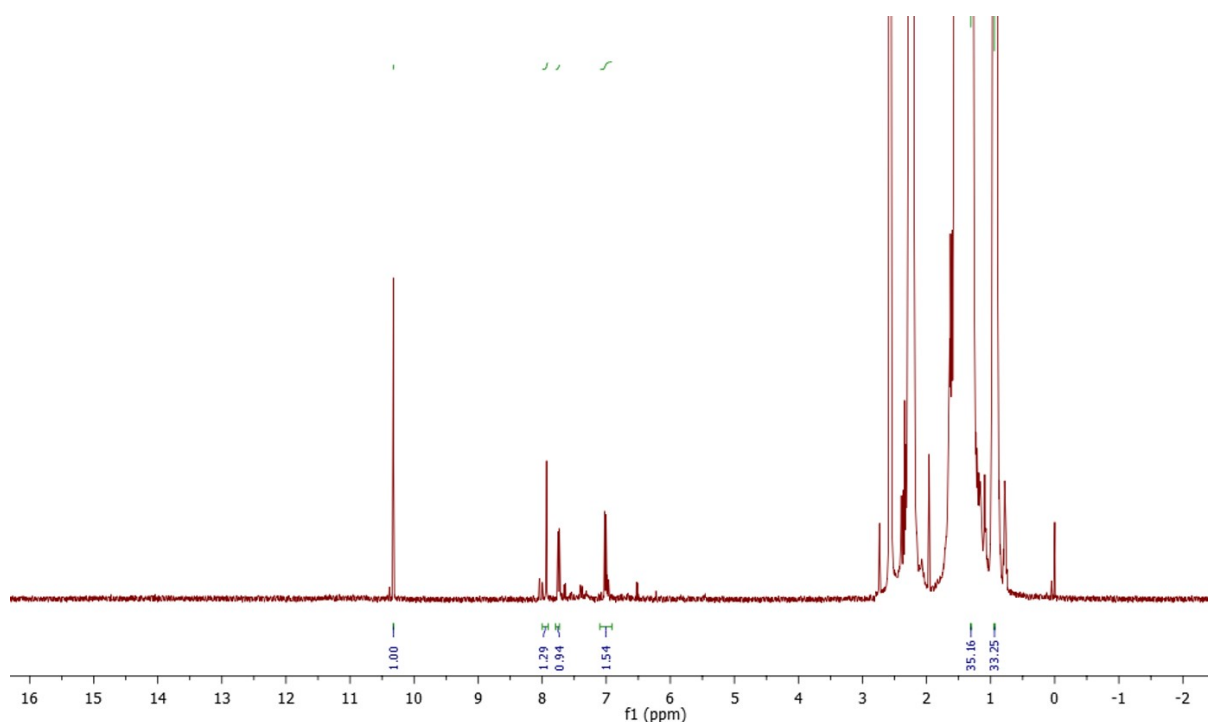

**Fig. S1:**  $^1\text{H}$  NMR spectrum ( $\text{DMSO-}d_6$ , 400 MHz) of  $[\text{TTP}][\text{FHS}]$ .

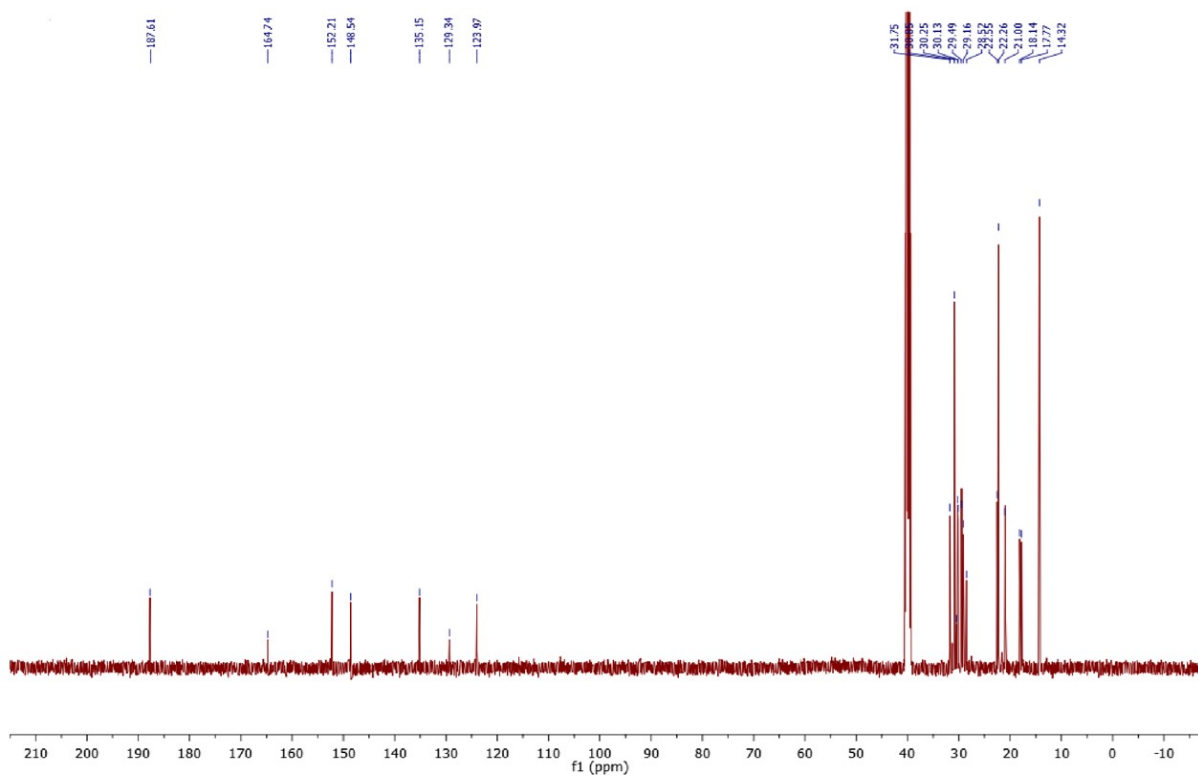

**Fig. S2:**  $^{13}\text{C}$  NMR spectrum ( $\text{DMSO-}d_6$ , 100 MHz) of  $[\text{TTP}][\text{FHS}]$ .

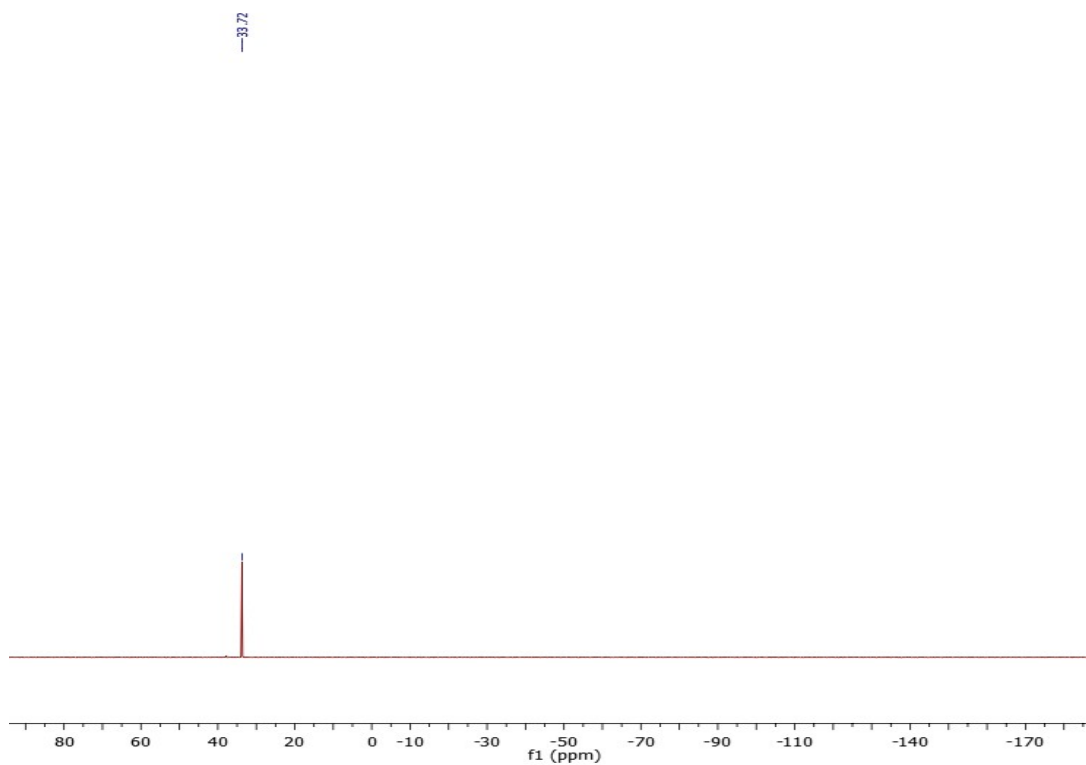

**Fig. S3:**  $^{31}\text{P}$  NMR spectrum ( $\text{DMSO-}d_6$ , 400 MHz) of  $[\text{TTP}][\text{FHS}]$ .

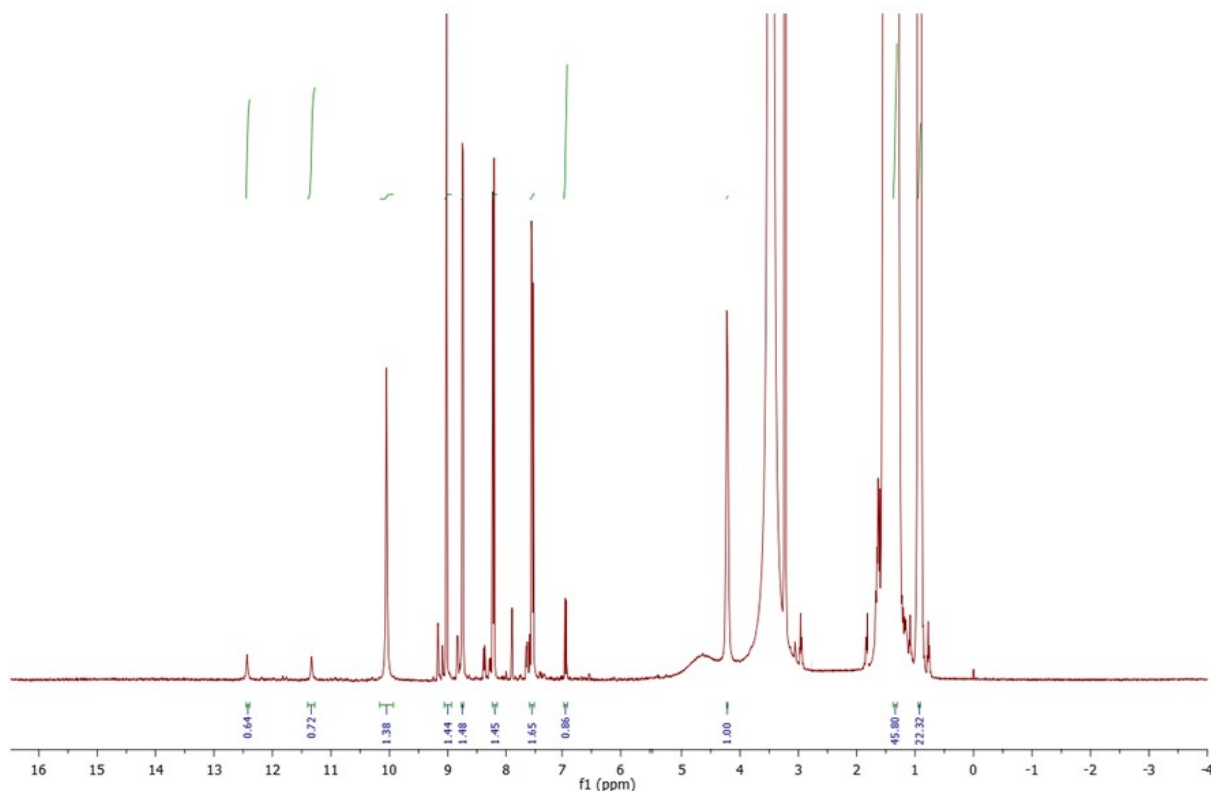

**Fig. S4:**  $^1\text{H}$  NMR spectrum ( $\text{DMSO-}d_6$ , 400 MHz) of **HNMIL**.

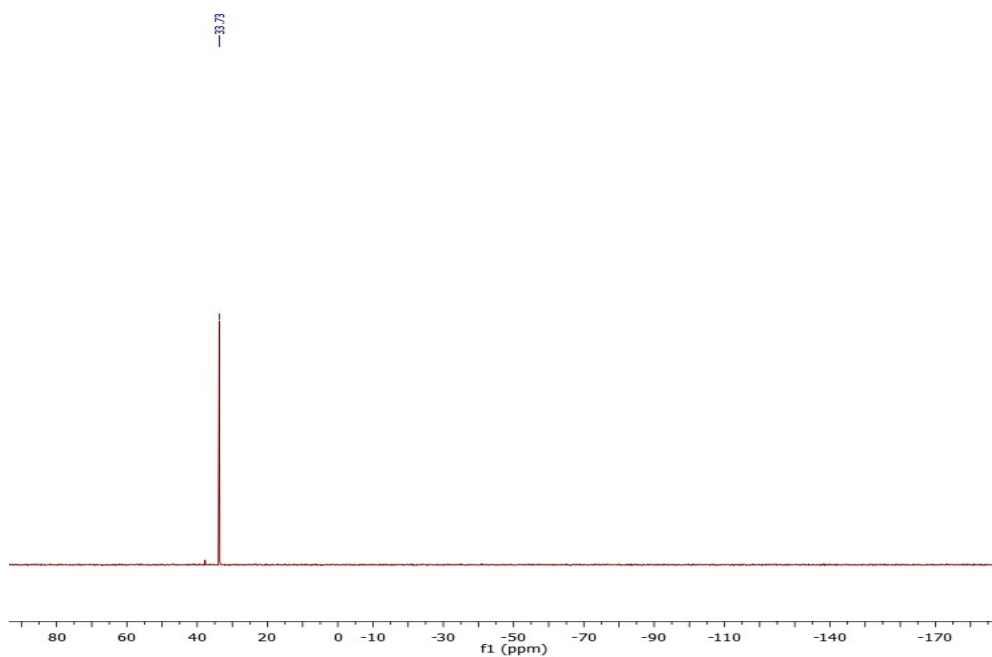

**Fig. S5.**  $^{31}\text{P}$  NMR spectrum ( $\text{DMSO-}d_6$ , 400 MHz) of **[TTP][FHS]**.

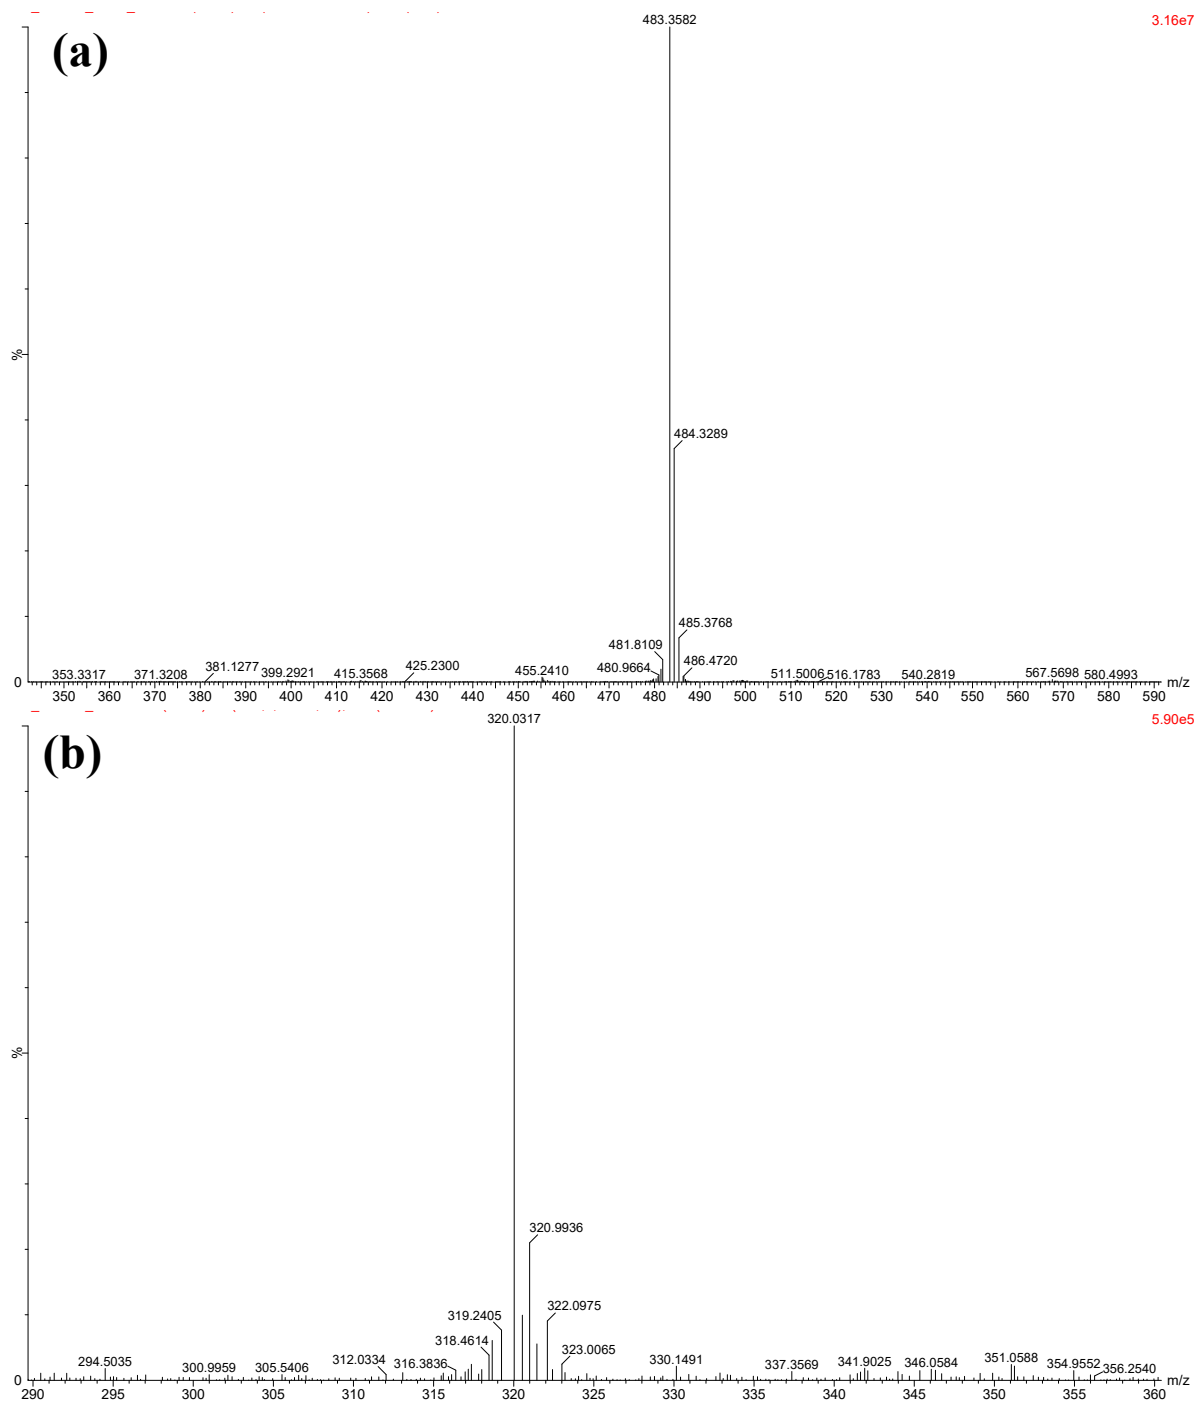

**Fig. S6:** LC-MS spectra of HDIL (a) positive ion mode and (b) negative ion mode.

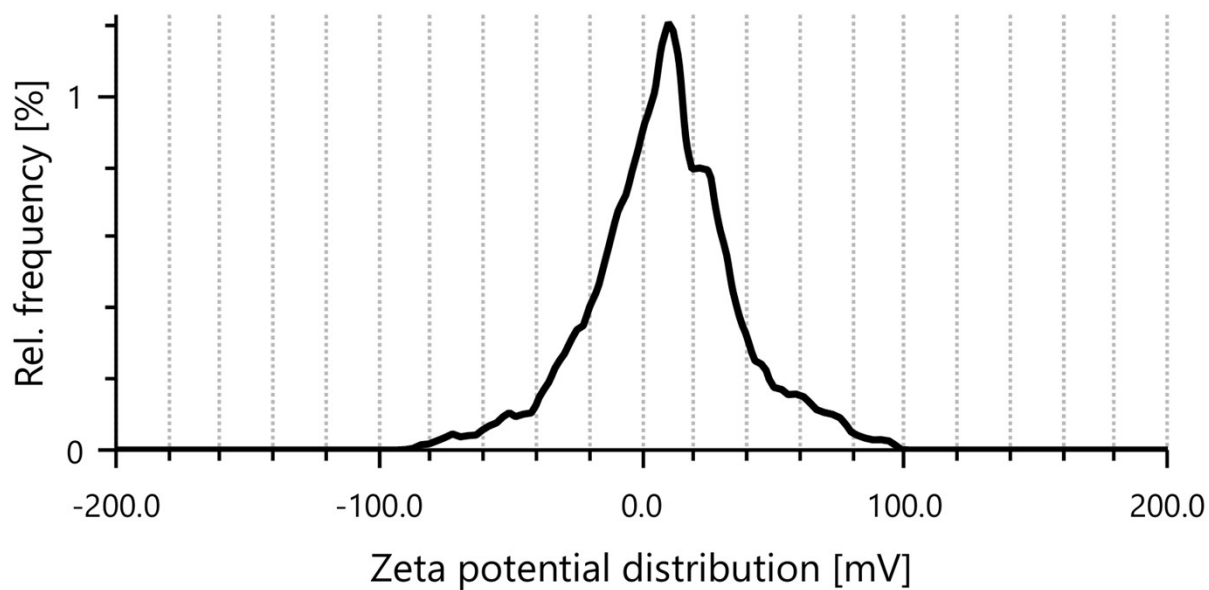

**Fig. S7:** The relative frequency vs. zeta potential distribution curve for the determination of the zeta potential of **nHNMIL**.

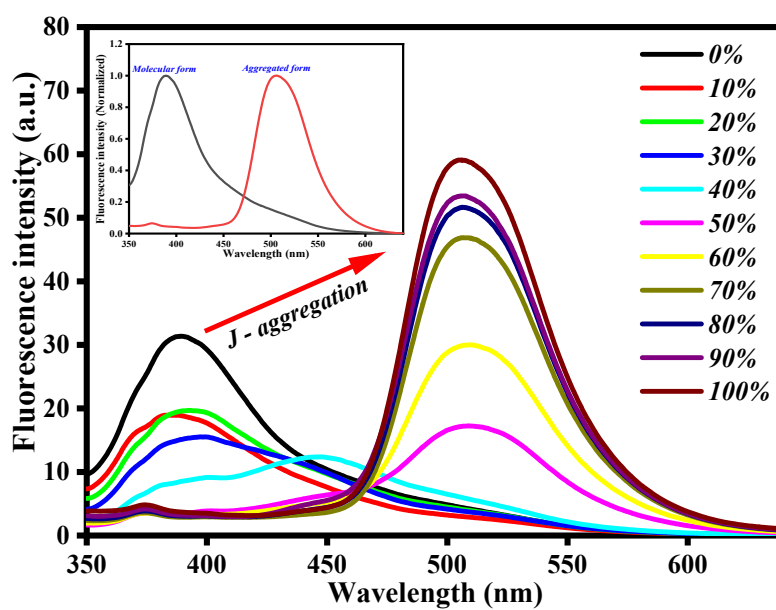

**Fig. S8:** Fluorescence spectra of **HNMIL** in water-DMSO mixed solvents demonstrating red shift.

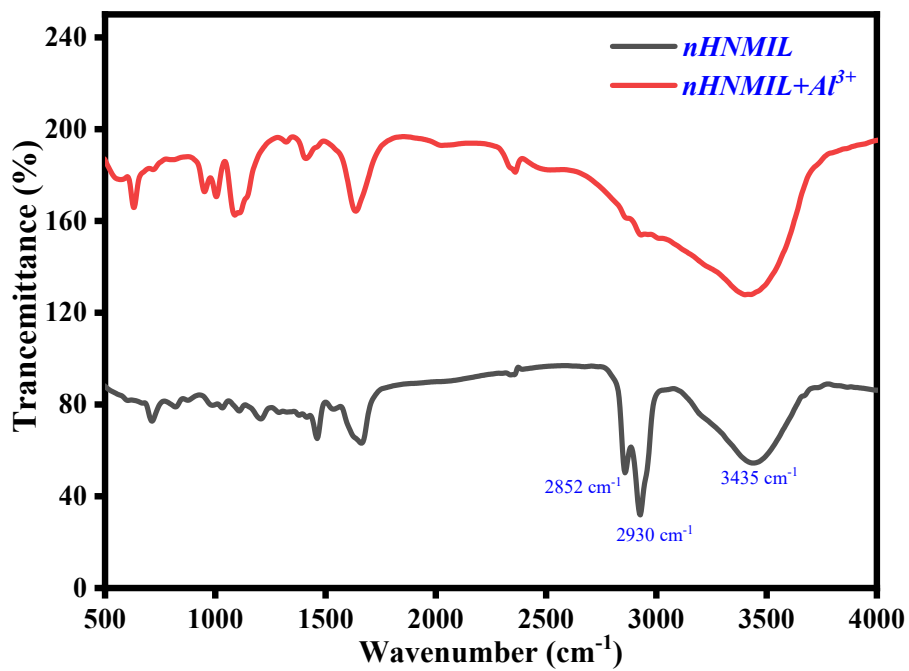

**Fig. S9:** FT-IR spectra of *nHNMIL* before and after the interaction with  $\text{Al}^{3+}$  ions.

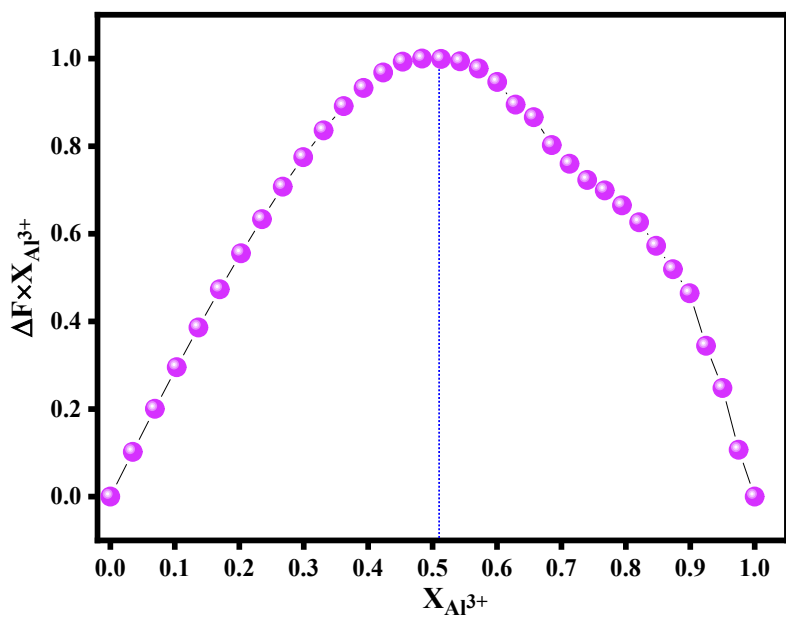

**Fig. S10:** Job's plot demonstrating the 1:1 stoichiometric ratio, interaction of  $\text{Al}^{3+}$  ion with *nHNMIL*.

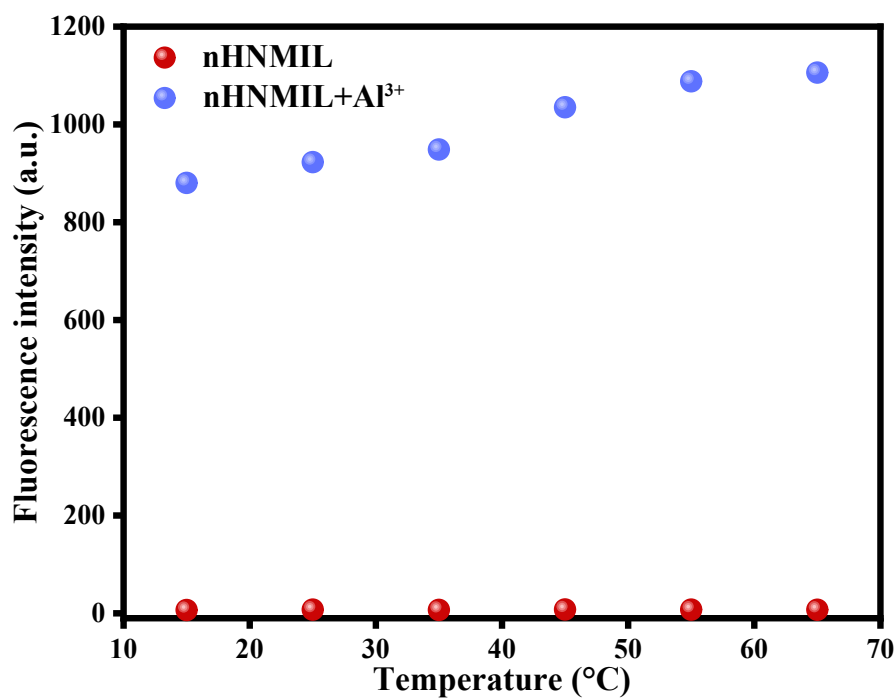

**Fig. S11:** Temperature-dependent fluorescence study of **nHNMIL** and **nHNMIL-Al<sup>3+</sup>** complex.

**Table S1.** Calculated  $\Delta G$  values at various temperatures.

| Temperature(°C) | $\Delta G$ (J mol <sup>-1</sup> ) | $\Delta H$ (J mol <sup>-1</sup> ) | $\Delta S$ (J mol <sup>-1</sup> K <sup>-1</sup> ) |
|-----------------|-----------------------------------|-----------------------------------|---------------------------------------------------|
| 15              | -23497.62858                      | -22273                            | 81.59                                             |
| 25              | -24313.51846                      |                                   |                                                   |
| 35              | -25129.40835                      |                                   |                                                   |
| 45              | -25945.29823                      |                                   |                                                   |
| 55              | -26761.18811                      |                                   |                                                   |
| 65              | -27577.07799                      |                                   |                                                   |

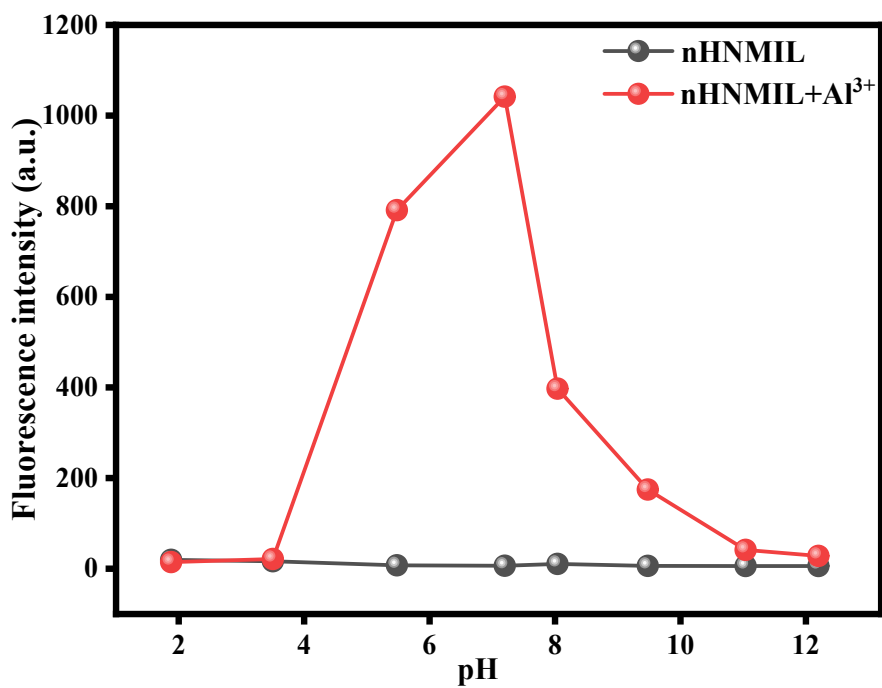

Fig. S12: pH study of nHNMIL and nHNMIL-Al<sup>3+</sup> complex.

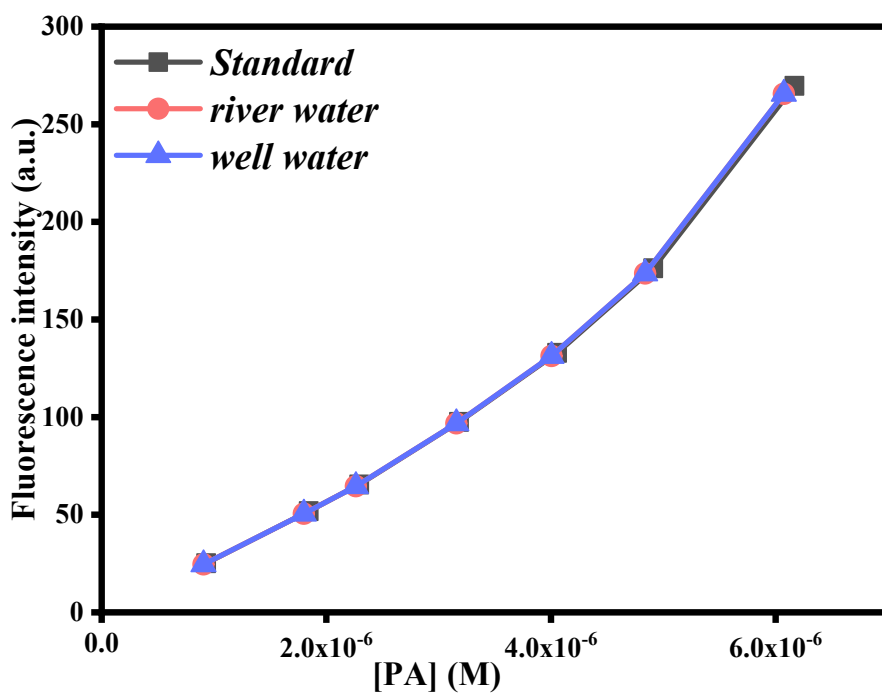

Fig. S13: Calibration curve for determining Al<sup>3+</sup> contamination in different water samples.

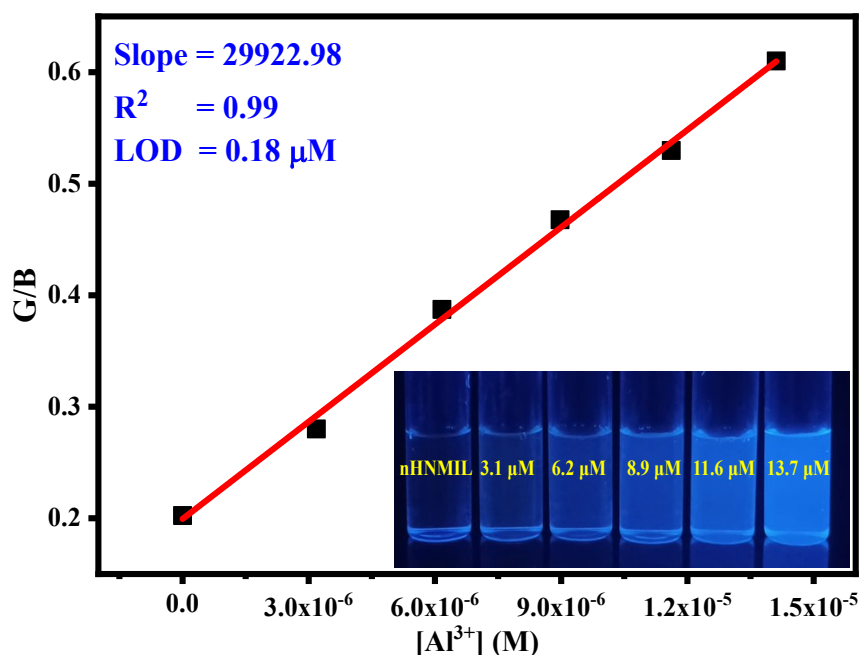

**Fig. S14:** The calibration curve of G/B vs. [Al<sup>3+</sup>] using a smartphone-based method under 365-nm UV irradiation, shot by Vivo Y31-S smartphone.

**Table S2:** Quantitative comparison between smartphone-based measurements and laboratory fluorimeter data.

| Sl. no     | [Al] | G/B           |                | Laboratory fluorimeter data (a.u.) |
|------------|------|---------------|----------------|------------------------------------|
|            |      | Realme 6      | Vivo Y31-S     |                                    |
| 1.         | 0    | 0.22368       | 0.20237        | 4.718                              |
| 2.         | 3.1  | 0.34          | 0.28           | 211                                |
| 3.         | 6.2  | 0.41727       | 0.38727        | 443                                |
| 4.         | 8.9  | 0.48765       | 0.46765        | 669                                |
| 5.         | 11.6 | 0.58974       | 0.52974        | 861                                |
| 6.         | 13.7 | 0.65          | 0.61           | 1017                               |
| <b>LOD</b> |      | <b>0.1 μM</b> | <b>0.18 μM</b> | <b>48 pM</b>                       |

**Table S3:** Determination of Al<sup>3+</sup> in water samples.

| Sample      | Added (μM) | Found (μM) | Recovery (%) |
|-------------|------------|------------|--------------|
| River water | 0.93       | 0.92       | 99.007       |

|                   |      |      |       |
|-------------------|------|------|-------|
|                   | 1.84 | 1.78 | 97.02 |
|                   | 2.3  | 2.27 | 98.99 |
|                   | 3.2  | 3.11 | 98.00 |
|                   | 4.05 | 4.01 | 99.09 |
|                   | 4.9  | 4.86 | 99.09 |
|                   | 6.2  | 6.09 | 98.85 |
| <b>Well water</b> | 0.93 | 0.90 | 97.53 |
|                   | 1.84 | 1.79 | 97.62 |
|                   | 2.3  | 2.26 | 98.70 |
|                   | 3.2  | 3.15 | 99.25 |
|                   | 4.05 | 4    | 98.79 |
|                   | 4.9  | 4.8  | 98.52 |
|                   | 6.2  | 6.07 | 98.47 |

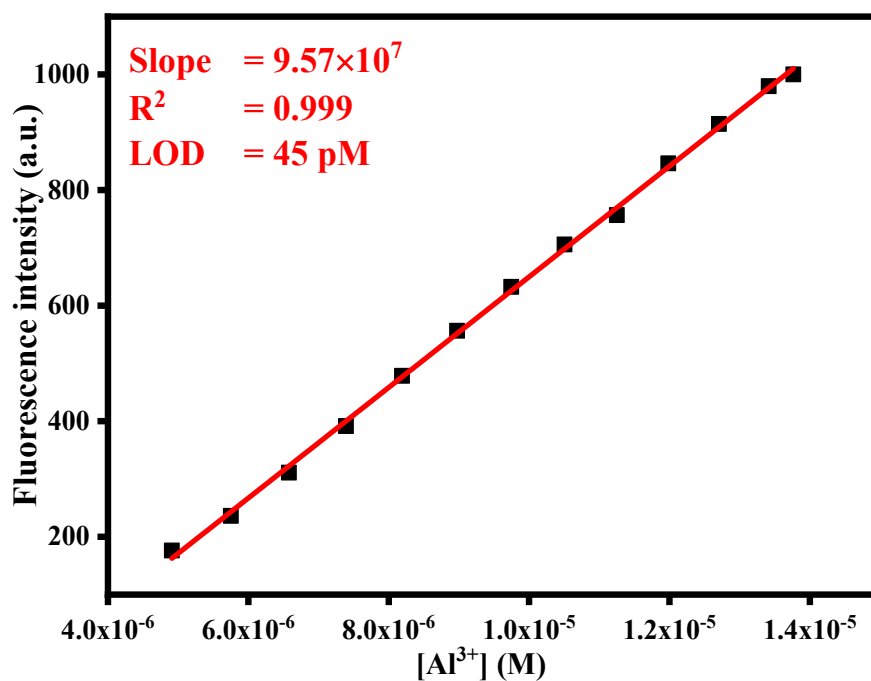

**Fig. S15:** Estimation of LOD in real matrix (River water).

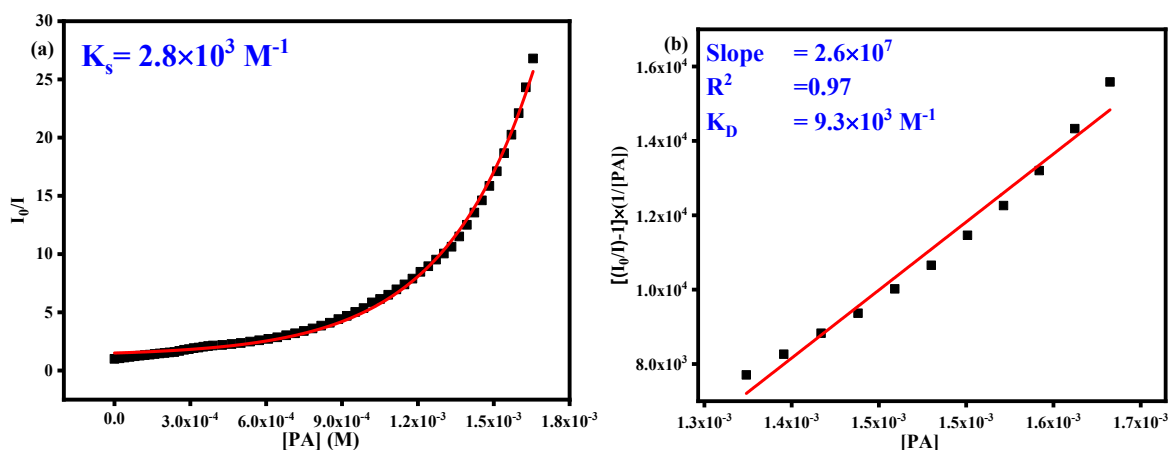

**Fig. S16:** Plot demonstrating the interaction of PA with our formulated **nHNMIL-Al<sup>3+</sup>** complex (a) statically and (b) dynamically.

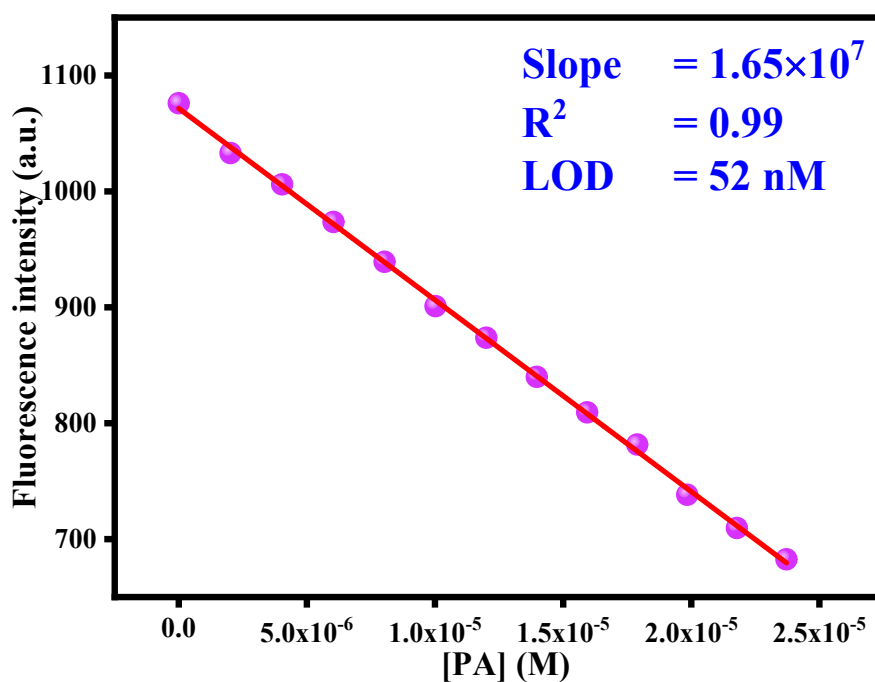

**Fig. S17.** Detection limit of PA with our formulated **nHNMIL-Al<sup>3+</sup>** complex.

**Table S4:** Comparison table of different chemosensors that have been introduced for detecting Al<sup>3+</sup> ions in the last few decades, with our prepared **nHNMIL**.

| Structure                                                                           | solvent | LOD     | Sensory type | Response time        | Ref |
|-------------------------------------------------------------------------------------|---------|---------|--------------|----------------------|-----|
| 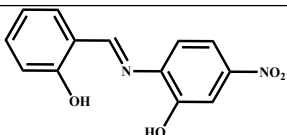 | DMF     | 9.45 nM | Ratiometric  | within a few seconds | 1   |

|                                                                                     |                                                                 |              |          |                   |    |
|-------------------------------------------------------------------------------------|-----------------------------------------------------------------|--------------|----------|-------------------|----|
| 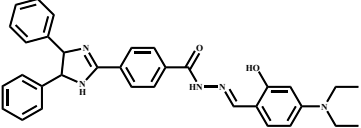   | EtOH/H <sub>2</sub> O<br>(1:1)                                  | 74.75<br>nM  | Turn-on  | ~10 min           | 2  |
|    | DMSO H <sub>2</sub> O,                                          | 0.17 μM      | Turn-on  | -                 | 3  |
|    | THF/H <sub>2</sub> O,<br>1:1 (v/v),<br>HEPES =50<br>mM, pH =7.4 | 0.02 μM      | Turn-on  | <10 s             | 4  |
|   | Methanol–<br>water<br>medium                                    | 3.50 nM      | Turn-on  | Rapid<br>response | 5  |
|  | EtOH                                                            | 0.013<br>ppm | Turn-off | rapid<br>response | 6  |
|  | Aqueous/env<br>ironmental<br>samples                            | 6.7 nM       | Turn-on  | ≤3 min            | 7  |
|  | 20 % (v/v)<br>water-DMSO<br>medium                              | 15 nM        | Turn-on  | rapid<br>response | 8  |
|  | DMF                                                             | 8.6 nM       | Turn-on  | rapid<br>response | 9  |
|  | DMSO/H <sub>2</sub> O<br>(7:3)                                  | 1.11 μM      | Turn-on  | Fast<br>response  | 10 |

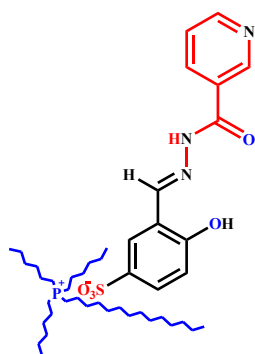

Water  
dispersion

37 pM

Turn-on

Within  
few sec

This  
work

**Table S5:** Comparison with the detection limits of sensing PA by various sensors.

| System                                        | LOD        | References       |
|-----------------------------------------------|------------|------------------|
| HL-Al <sup>3+</sup> complex                   | 0.623 μM   | 11               |
| ZnSe quantum dots                             | 12.4 μM    | 12               |
| ZnO nanoparticles                             | 7.8 μM     | 13               |
| Dabsyl derivative                             | 7.2 μM     | 14               |
| bluish-green fluorescent histidine            | 2.72 μM    | 15               |
| Dy(III)-based MOFs                            | 7.1 μM     | 16               |
| Phenanthroimidazole derivatives               | 2.3-4.6 μM | 17               |
| carbon dots                                   | 0.63 μM    | 18               |
| FRET-based rhodamine derivative               | 0.82 μM    | 19               |
| anthracene-bridged poly (N-vinyl pyrrolidone) | 6 μM       | 20               |
| Ionic liquid-based nano-optode                | 52 nM      | <b>This work</b> |

## References

- 1 M. Rajbanshi, M. Mahato, J. Chourasia, S. Ghanta, and S. K. Das, *J. Mol. Struct.*, 2023, **1284**, 135357.
- 2 J. Wang, L. Ren, Y. Liu, P. Wang, Y. Chen and D. Zhang, *J. Fluoresc.* 2025 3512, 2025, **35**, 13267–13278.

- 3 Heena, A. Silswal, D. Sharma, A. L. Koner, H. Om, and R. Rana, *Spectrochim. Acta Part A Mol. Biomol. Spectrosc.*, 2024, **320**, 124575.
- 4 T. J. Dathees, S. P. Makarios Paul, A. Sanmugam, A. Abiram, S. Murugan, R. S. Kumar, A. I. Almansour, N. Arumugam, R. Nandhakumar, and D. Vikraman, *Spectrochim. Acta Part A Mol. Biomol. Spectrosc.*, 2024, **308**, 123732.
- 5 G. Kumar, I. Singh, R. Goel, K. Paul, and V. Luxami, *Spectrochim. Acta Part A Mol. Biomol. Spectrosc.*, 2024, **322**, 124784.
- 6 N. Apiratikul, P. Bunrit, S. Jommaroeng, P. Boonsri, and K. Songsrirote, *Sensors Int.*, 2025, **6**, 100313.
- 7 M. Liu, H. Zhu, Y. Fang, C. Liu, X. Li, X. Zhang, L. Ma, K. Wang, M. Yu, W. Sheng, and B. Zhu, *Spectrochim. Acta Part A Mol. Biomol. Spectrosc.*, 2024, **307**, 123578.
- 8 S. Ahamed, A. R. Das, J. Chourasia, S. Ali, S. Lama, S. Rai, U. Darnal, S. Pradhan, and S. K. Das, *J. Mol. Struct.*, 2025, **1333**, 141753.
- 9 P. Sarkar, M. Mahato, S. Ahamed, N. Tohora, M. Rajbanshi, J. Chourasia, A. Maiti, S. Ghanta, and S. Kumar Das, *Inorganica Chim. Acta*, 2024, **572**, 122273.
- 10 R. Bhowmick, P. Mondal and P. Chattopadhyay, *RSC Adv.*, 2023, **13**, 3394–3401.
- 11 M. Mahato, S. Mardanya, Z. Rahman, N. Tohora, P. Pramanik, S. Ghanta, A. A. Chowdhury, T. K. Shaw, and S. K. Das, *J. Photochem. Photobiol. A Chem.*, 2022, **433**, 114168.
- 12 V. Sharma and M. S. Mehata, *Spectrochim. Acta Part A Mol. Biomol. Spectrosc.*, 2021, **260**, 119937.
- 13 A. A. Ibrahim, P. Tiwari, M. S. Al-Assiri, A. E. Al-Salami, A. Umar, R. Kumar, S. H. Kim, Z. A. Ansari, and S. Baskoutas, *Mater. (Basel, Switzerland)*, DOI:10.3390/MA10070795.
- 14 P. Kumar, D. Arya, D. Nain, A. Singh, A. Ghosh, and D. A. Jose, *Dye. Pigment*, 2019,

- 166**, 443–450.
- 15 R. Patel, S. Bothra, R. Kumar and S. K. Sahoo, *Nano-Structures & Nano-Objects*, 2019, **19**, 100345.
- 16 R. Rajak, M. Saraf, S. K. Verma, R. Kumar, and S. M. Mobin, *Inorg. Chem.*, 2019, **58**, 16065–16074.
- 17 R. Ahmed, A. Ali, M. Ahmad, A. Alsalme, R. A. Khan, and F. Ali, *New J. Chem.*, 2020, **44**, 20092–20100.
- 18 A. Kathiravan, A. Gowri, V. Srinivasan, T. A. Smith, M. Ashokkumar and M. Asha Jhonsi, *Analyst*, 2020, **145**, 4532–4539.
- 19 A FRET-based fluorescent and colorimetric probe for the specific Detection of picric acid - RSC Advances (RSC Publishing) DOI:10.1039/C8RA05468A, <https://pubs.rsc.org/en/content/articlehtml/2018/ra/c8ra05468a>, (accessed 8 October 2025).
- 20 R. Singh, K. Mitra, S. Singh, S. Senapati, V. K. Patel, S. Vishwakarma, A. Kumari, J. Singh, S. K. Sen Gupta, N. Misra, P. Maiti and B. Ray, *Analyst*, 2019, **144**, 3620–3634.
